# Supplementary material for: Manure fertilization shapes the soil resistome but not the radish crop resistome
Source: Research Square preprint supplement (doi:10.21203/rs.3.rs-7978979/v1), 2025-11-25
Supplement: Supplementary file 1 [file ccdb76602c39b2fa4833a163.xlsx]

## Sheet: Supplementary table 1
Supplementary Table 1. Soil physicochemical characterization.
Parameter
Soil organic matter (%)	5.03
Dry matter (%)	80.29
Total carbon (%)	7.2
Total nitrogen (%)	0.37
Ammonium (mg N-NH4+ kg-1)	4.72
Nitrate (mg N-NO3- kg-1)	26.33
Carbonate (%)	30.27
C/N ratio	7.9
Olsen phosphorus (mg kg-1)	23.75
Extractable magnessium (mEq 100 g-1)	1.16
Extractable potassium (mg kg-1)	171.35
Extractable calcium (mEq 100 g-1)	34.29
pH in water (1:2.5, w/v)	7.97
Effective cation exchange capacity (COHEX) (mEq 100 g-1)	24.64
Electric conductivity in water (mS cm-1)	0.191
Active lime (%)	7.89
Clay (%)	25.7
Fine sand (%)	31.65
Coarse sand (%)	5.1
Silt (%)	37.56
Textural class	Loam

## Sheet: Supplementary table 2
Supplementary Table 2. Primer sets used in HT-qPCR analysis.
Gene target	Resistance Mechanism	Target antibiotics	Forward primer	Reverse Primer
16S old 1			GGGTTGCGCTCGTTGC	ATGGYTGTCGTCAGCTCGTG
aac(3)-ib	aac(3)-ib	Aminoglycoside	CAGCGAGACGTTCATCGC	CACGCTTCAGGTGGCTAATC
aac(6')I1	deactivate	Aminoglycoside	GGGAATTATCGGAATAGCTCTTGG	TTGGGCTGTTCTTCCTAGCTAA
aacC2	deactivate	Aminoglycoside	ACGGCATTCTCGATTGCTTT	CCGAGCTTCACGTAAGCATTT
aadA6	aadA6	Aminoglycoside	CCATCGAGCGTCATCTGGAA	CCCGTCTGGCCGGATAAC
aadE	deactivate	Aminoglycoside	TACCTTATTGCCCTTGGAAGAGTTA	GGAACTATGTCCCTTTTAATTCTACAATCT
acrA	efflux	MDR	GGTCTATCACCCTACGCGCTATC	GCGCGCACGAACATACC
acrF	efflux	MDR	GCGGCCAGGCACAAAA	TACGCTCTTCCCACGGTTTC
adeA	efflux	MDR	CAGTTCGAGCGCCTATTTCTG	CGCCCTGACCGACCAAT
ant6-ia	ant6-ia	Aminoglycoside	TCGCCATGAGCTGCTGA	CCTATCATACTCCGGATAGGCATA
ant6-ib	aph3-III	Aminoglycoside	AGAACATCCGACAGCACGTTC	CCAACCTTCCATGAAATCATTCGC
aph3-III	aph3-III	Aminoglycoside	CAGAAGGCAATGTCATACCACTTG	GACAGCCGCTTAGCCGAA
bacA	deactivate	Other	ATCCGCGGCACCCTGA	CCTGCTTGATGGACTTGATGAAGA
bla1	deactivate	Beta Lactam	GCAAGTTGAAGCGAAAGAAAAGA	TACCAGTATCAATCGCATATACACCTAA
blaB-11,13,14	blaB-11,13,14	Beta lactamase	CGTGCCGGAGGTCTTGAATA	GGGATAGTAAACCTGAAACTCGGA
blaCMY	deactivate	beta Lactam	AAAGCCTCATGGGTGCATAAA	ATAGCTTTTGTTTGCCAGCATCA
blaCTX-M	deactivate	Beta Lactam	GCGATAACGTGGCGATGAAT	GTCGAGACGGAACGTTTCGT
blaGES	deactivate	Beta Lactam	GCAATGTGCTCAACGTTCAAG	GTGCCTGAGTCAATTCTTTCAAAG
bla-L1	deactivate	Beta Lactam	CACCGGGTTACCAGCTGAAG	GCGAAGCTGCGCTTGTAGTC
blaOXY-1	deactivate	Beta lactamase	AAAGGTGACCGCATTCGC	CCAGCGTCAGCTTGCG
blaOXY-2	deactivate	Beta Lactam	CGTTCAGGCGGCAGGTT	GCCGCGATATAAGATTTGAGAATT
blaZ	deactivate	Beta Lactam	GGAGATAAAGTAACAAATCCAGTTAGATATGA	TGCTTAATTTTCCATTTGCGATAAG
catA1	catA1	Amphenicol	GGGTGAGTTTCACCAGTTTTGATT	CACCTTGTCGCCTTGCGTATA
catB2	catB2	Phenicol	GCTACTATTCCGGCTATTACCATG	GGGCTCCTCGTTCATGTAGA
catB3	catB3	Amphenicol	GCACTCGATGCCTTCCAAAA	AGAGCCGATCCAAACGTCAT
ceoA	efflux	Amphenicol	ATCAACACGGACCAGGACAAG	GGAAAGTCCGCTCACGATGA
cmlA1	cmlA1	Amphenicol	TAGGAAGCATCGGAACGTTGAT	CAGACCGAGCACGACTGTTG
cmx(A)	efflux	Amphenicol	GCGATCGCCATCCTCTGT	TCGACACGGAGCCTTGGT
dfrA1	protection	Other	GGAATGGCCCTGATATTCCA	AGTCTTGCGTCCAACCAACAG
dfrA12	protection	Other	CCTCTACCGAACCGTCACACA	GCGACAGCGTTGAAACAACTAC
dfra14	dfra14	Trimethoprim	CGGATCATGTCATTGTTTCAGG	ATGTTAGAGGCGAAGTCTTGG
dfrA15	dfrA15	Trimethoprim	AGGCCGAAAGACTTTCGAGTC	TCACCTTCTGGCTCAATGTCG
dfra17	dfra17	Trimethoprim	CGGGAACGGCCCTGATATTCC	CGTGTTGCGACCGCATACTTTC
dfrA25	dfrA25	Trimethoprim	TCAAACTGGACAGCGGCTA	GTCGATTGTCGACACATGCA
dfrBmulti	dfrBmulti	Trimethoprim	ACCAAGGCAGAAGTGAAGTCA	GGTGAGCCTCAGACTCGAC
emrD	efflux	MDR	CTCAGCAGTATGGTGGTAAGCATT	ACCAGGCGCCGAAGAAC
erm(36)	protection	MLSB	GGCGGACCGACTTGCAT	TCTGCGTTGACGACGGTTAC
erm(B)	protection	MLSB	GAACACTAGGGTTGTTCTTGCA	CTGGAACATCTGTGGTATGGC
ermT	protection	MLSB	GTTCACTAGCACTATTTTTAATGACAGAAGT	GAAGGGTGTCTTTTTAATACAATTAACGA
fexA	fexA	Phenicol	TGGTGTGGCTGTTGCAATCTTA	CCAAGGTACAAAGCACCTTGGA
floR	floR	Amphenicol	AACCCGCCCTCTGGATCA	GCCGTCGAGAAGAAGACGAA
int1-a-marko	MGE	Integrase	CGAAGTCGAGGCATTTCTGTC	GCCTTCCAGAAAACCGAGGA
intI1F165_clinical	MGE	Integrase	CGAACGAGTGGCGGAGGGTG	TACCCGAGAGCTTGGCACCCA
intl2	MGE	Integrase	TGCTTTTCCCACCCTTACC	GACGGCTACCCTCTGTTATCTC
intl3	MGE	Integrase	CAGGTGCTGGGCATGGA	CCTGGGCAGCATCACCA
IS613	MGE	Transposase	AGGTTCGGACTCAATGCAACA	TTCAGCACATACCGCCTTGAT
KPC	deactivate	Beta Lactam	GCCGCCAATTTGTTGCTGAA	GCCGGTCGTGTTTCCCTTT
lnuA	deactivate	MLSB	TGACGCTCAACACACTCAAAAA	TTCATGCTTAAGTTCCATACGTGAA
lnuB	deactivate	MLSB	GGATCGTTTACCAAAGGAGAAGG	AGCATAGCCTTCGTATCAGGAA
mcr-1	mcr-1	Other	CACATCGACGGCGTATTCTG	CAACGAGCATACCGACATCG
mdtE/yhiU	efflux	MDR	CGTCGGCGCACTCGTT	TCCAGACGTTGTACGGTAACCA
mdtg	efflux	MDR	TTCCAGCCGGTCAGCAA	GACATCTCCCGCGAGTTCG
mdth	mdth	MDR-chromo	ATGCTGGCTGTACAAGTGATG	CACTCCAGCGGGCGATA
mecA	protection	Beta Lactam	GGTTACGGACAAGGTGAAATACTGAT	TGTCTTTTAATAAGTGAGGTGCGTTAATA
mepA	efflux	MDR	ATCGGTCGCTCTTCGTTCAC	ATAAATAGGATCGAGCTGCTGGAT
mexB	efflux	MDR	CTGGAGATCGACGACGAGAAG	GAAATCGTTGACGTAGCTGGAA
mphA	deactivate	MLSB	TCAGCGGGATGATCGACTG	GAGGGCGTAGAGGGCGTA
mphB	deactivate	MLSB	CGCAGCGCTTGATCTTGTAG	TTACTGCATCCATACGCTGCTT
msr(A)	efflux	MLSB	CTGCTAACACAAGTACGATTCCAAAT	TCAAGTAAAGTTGTCTTACCTACACCATT
norA	norA	Fluoroquinolone	ATCGCCGTTTGGTGGTACG	TCCACCAATCCCTGGTCCTAAA
oleC	efflux	MLSB	CCCGGAGTCGATGTTCGA	GCCGAAGACGTACACGAACAG
Pbp5	protection	Beta Lactam	GGCGAACTTCTAATTAATCCTATCCA	CGCCGATGACATTCTTCTTATCTT
penA	protection	Beta Lactam	AGACGGTAACGTATAACTTTTTGAAAGA	GCGTGTAGCCGGCAATG
qnrA	protection	Fluoroquinolone	AGGATTTCTCACGCCAGGATT	CCGCTTTCAATGAAACTGCAA
QnrB4	QnrB4	Fluoroquinolone	TCACCACCCGCACCTG	GGATATCTAAATCGCCCAGTTCC
QnrS1_S3_S5	QnrS1_S3_S5	Fluoroquinolone	CCACTTTGATGTCGCAGATCTTC	CCCTCTCCATATTGGCATAGGAAA
strA	deactivate	Aminoglycoside	CCGGTGGCATTTGAGAAAAA	GTGGCTCAACCTGCGAAAAG
strB	protection	Sulfonamide	GCTCGGTCGTGAGAACAATCT	CAATTTCGGTCGCCTGGTAGT
sul1 NEW	protection	Sulfonamide	GCCGATGAGATCAGACGTATTG	CGCATAGCGCTGGGTTTC
sul2	protection	Sulfonamide	TCATCTGCCAAACTCGTCGTTA	GTCAAAGAACGCCGCAATGT
tet(32)	protection	Tetracycline	CCATTACTTCGGACAACGGTAGA	CAATCTCTGTGAGGGCATTTAACA
tet44	tet44	Tetracycline	CTCATGTAGATGCAGGAAAGACG	GTAACTGCTGCCTGAATTGTGA
tetA	efflux	Tetracycline	CTCACCAGCCTGACCTCGAT	CACGTTGTTATAGAAGCCGCATAG
tetB	efflux	Tetracycline	AGTGCGCTTTGGATGCTGTA	AGCCCCAGTAGCTCCTGTGA
tetG_F	efflux	Tetracycline	TCGCGTTCCTGCTTGCC	CCGCGAGCGACAAACCA
tetH	efflux	Tetracycline	TTTGGGTCATCTTACCAGCATTAA	TTGCGCATTATCATCGACAGA
tetL	efflux	Tetracycline	ATGGTTGTAGTTGCGCGCTATAT	ATCGCTGGACCGACTCCTT
tetM	protection	Tetracycline	GGAGCGATTACAGAATTAGGAAGC	TCCATATGTCCTGGCGTGTC
tetO	protection	Tetracycline	CAACATTAACGGAAAGTTTATTGTATACCA	TTGACGCTCCAAATTCATTGTATC
tetQ	protection	Tetracycline	CGCCTCAGAAGTAAGTTCATACACTAAG	TCGTTCATGCGGATATTATCAGAAT
tetR	regulator	Tetracycline	CCGTCAATGCGCTGATGAC	GCCAATCCATCGACAATCACC
tetS	protection	Tetracycline	TTAAGGACAAACTTTCTGACGACATC	TGTCTCCCATTGTTCTGGTTCA
tetT	protection	Tetracycline	CCATATAGAGGTTCCACCAAATCC	TGACCCTATTGGTAGTGGTTCTATTG
tetW	protection	Tetracycline	ATGAACATTCCCACCGTTATCTTT	ATATCGGCGGAGAGCTTATCC
tetX	deactivate	Tetracycline	AAATTTGTTACCGACACGGAAGTT	CATAGCTGAAAAAATCCAGGACAGTT
tnpA	MGE	Transposase	GCCGCACTGTCGATTTTTATC	GCGGGATCTGCCACTTCTT
tnpA	MGE	Transposase	AATTGATGCGGACGGCTTAA	TCACCAAACTGTTTATGGAGTCGTT
tolC	efflux	MDR	GGCCGAGAACCTGATGCA	AGACTTACGCAATTCCGGGTTA
Tp614	MGE	Transposase	GGAAATCAACGGCATCCAGTT	CATCCATGCGCTTTTGTCTCT
VanB	protection	Vancomycin	TTGTCGGCGAAGTGGATCA	AGCCTTTTTCCGGCTCGTT
vanHB	protection	Vancomycin	GAGGTTTCCGAGGCGACAA	CTCTCGGCGGCAGTCGTAT
vanRA	protection	Vancomycin	CCCTTACTCCCACCGAGTTTT	TTCGTCGCCCCATATCTCAT
vanSA	protection	Vancomycin	CGCGTCATGCTTTCAAAATTC	TCCGCAGAAAGCTCAATTTGTT
vanYB	protection	Vancomycin	GGCTAAAGCGGAAGCAGAAA	GATATCCACAGCAAGACCAAGCT
vat(E)	vat(E)	MLSB	GACCGTCCTACCAGGCGTAA	TTGGATTGCCACCGACAATT
copA		Cu resistance	GTGTACGGTCCGCTGGTTAT	CTTGAACACTCCGGTCCAG

## Sheet: Supplementary table 3
Supplementary Table 3. Relative abundances of ARGs and MGE-linked genes in (A) soil and (B) plant samples measured by HT-qPCR. Mean (n = 4) ± standard deviation. Statistically significant differences were determined with permutation ANOVA test and are represented as *(p < 0.1), **(p < 0.05), and ***(p < 0.01).
A) Soil samples
Plant presence	Fertilization	Moisture	aac(3)-ib	aac(6')I2	aacC2	aadA6	aadE	ant6-ia	ant6-ib	aph3-III	strA	catA1	catB3	ceoA	cmlA1	cmx(A)	floR	bla1	blaB-11_13_14	blaCMY	blaCTX-M	blaGES	bla.L1	blaOXY-1	blaOXY-2	blaZ	KPC	mecA	Pbp5	penA	copA	norA	qnrA	QnrB4	QnrS1_S3_S5	acrA	acrF	adeA	emrD	mdtE/yhiU	mdtg	mdth	mepA	mexB	tolC	erm(36)	erm(B)	ermT	lnuA
Planted with radish	Mineral	80% of the field capacity	0.005 ± 0.004	0 ± 0	0.058 ± 0.025	0.077 ± 0.025	2.106 ± 0.575	0.649 ± 0.201	0.019 ± 0.012	0.019 ± 0.011	0 ± 0	0.158 ± 0.066	0 ± 0	0 ± 0	0.004 ± 0.005	0 ± 0	0.297 ± 0.036	0 ± 0	0 ± 0	0.004 ± 0.006	0 ± 0	0 ± 0	0 ± 0	0.005 ± 0.005	0.001 ± 0.003	0 ± 0	0.067 ± 0.021	0 ± 0	0.049 ± 0.014	0 ± 0	0 ± 0	0 ± 0	1.003 ± 0.174	0 ± 0	0 ± 0	0.01 ± 0.008	0.001 ± 0.003	0.018 ± 0.015	0.005 ± 0.006	0.001 ± 0.002	0.718 ± 0.271	0.02 ± 0.014	0.047 ± 0.022	0.032 ± 0.014	0 ± 0	0.006 ± 0.007	0.032 ± 0.011	0.432 ± 0.122	0.005 ± 0.006
		20% of the field capacity	0.005 ± 0.004	0 ± 0	0.075 ± 0.031	0.053 ± 0.014	2.344 ± 1.243	0.548 ± 0.233	0.016 ± 0.004	0.012 ± 0.007	0.002 ± 0.004	0.12 ± 0.023	0 ± 0	0 ± 0	0 ± 0	0 ± 0	0.191 ± 0.062	0 ± 0	0 ± 0	0.001 ± 0.003	0 ± 0	0 ± 0	0.004 ± 0.004	0.005 ± 0.007	0.002 ± 0.005	0 ± 0	0.071 ± 0.028	0 ± 0	0.05 ± 0.029	0 ± 0	0.002 ± 0.004	0 ± 0	0.519 ± 0.235	0 ± 0	0 ± 0	0.007 ± 0.007	0 ± 0	0.017 ± 0.013	0.01 ± 0.013	0.003 ± 0.006	0.761 ± 0.207	0.008 ± 0.01	0.013 ± 0.01	0.043 ± 0.021	0 ± 0	0.005 ± 0.007	0.028 ± 0.01	0.31 ± 0.124	0.004 ± 0.006
	Manure	80% of the field capacity	0.005 ± 0.004	0 ± 0	0.114 ± 0.024	1.776 ± 0.377	1.121 ± 0.217	1.43 ± 0.768	0.015 ± 0.005	0.046 ± 0.026	0.004 ± 0.008	0.248 ± 0.074	0.201 ± 0.062	0.002 ± 0.003	0.02 ± 0.011	0 ± 0	3.795 ± 0.447	0 ± 0	0 ± 0	0.004 ± 0.005	0 ± 0	0 ± 0	0.009 ± 0.003	0 ± 0	0.003 ± 0.005	0 ± 0	0.409 ± 0.121	0.004 ± 0.004	0.409 ± 0.14	0 ± 0	0.012 ± 0.018	0.004 ± 0.005	0.793 ± 0.16	0 ± 0	0 ± 0	0.011 ± 0.007	0.003 ± 0.004	0.007 ± 0.007	0.012 ± 0.015	0.007 ± 0.008	0.929 ± 0.103	0.026 ± 0.016	0.512 ± 0.09	0.046 ± 0.01	0 ± 0	0.016 ± 0.012	0.036 ± 0.005	0.492 ± 0.076	0.015 ± 0.005
		20% of the field capacity	0.026 ± 0.004	0 ± 0	0.119 ± 0.019	1.059 ± 0.353	1.248 ± 0.074	1.405 ± 0.262	0.017 ± 0.005	0.043 ± 0.008	0 ± 0	0.249 ± 0.059	0.212 ± 0.069	0.004 ± 0.007	0.011 ± 0.007	0 ± 0	3.054 ± 0.3	0 ± 0	0 ± 0	0 ± 0	0 ± 0	0 ± 0	0.008 ± 0.008	0.002 ± 0.004	0.001 ± 0.003	0 ± 0	0.359 ± 0.02	0.002 ± 0.004	0.211 ± 0.027	0 ± 0	0 ± 0	0.001 ± 0.002	1.335 ± 0.225	0 ± 0	0 ± 0	0.005 ± 0.004	0.003 ± 0.004	0.011 ± 0.013	0.007 ± 0.008	0 ± 0	1.135 ± 0.268	0.026 ± 0.019	0.342 ± 0.032	0.031 ± 0.013	0 ± 0	0.013 ± 0.012	0.053 ± 0.02	0.531 ± 0.072	0.019 ± 0.006
Unplanted	Mineral	80% of the field capacity	0.014 ± 0.004	0 ± 0	0.084 ± 0.028	0.046 ± 0.016	5.126 ± 0.59	0.593 ± 0.206	0.026 ± 0.004	0.053 ± 0.03	0 ± 0	0.145 ± 0.049	0.007 ± 0.009	0 ± 0	0.012 ± 0.017	0 ± 0	0.271 ± 0.051	0 ± 0	0 ± 0	0 ± 0	0 ± 0	0 ± 0	0.002 ± 0.005	0.008 ± 0.015	0 ± 0	0 ± 0	0.064 ± 0.069	0 ± 0	0.104 ± 0.112	0.004 ± 0.007	0.001 ± 0.003	0 ± 0	0.653 ± 0.084	0 ± 0	0 ± 0	0.004 ± 0.005	0 ± 0	0 ± 0	0.031 ± 0.016	0.003 ± 0.006	1.237 ± 0.194	0.02 ± 0.011	0.036 ± 0.008	0.066 ± 0.031	0 ± 0	0.005 ± 0.006	0.046 ± 0.011	0.525 ± 0.191	0.009 ± 0.006
		20% of the field capacity	0.004 ± 0.006	0 ± 0	0.066 ± 0.01	0.056 ± 0.026	1.744 ± 0.145	0.671 ± 0.265	0.013 ± 0.005	0.011 ± 0.011	0.003 ± 0.005	0.168 ± 0.032	0 ± 0	0 ± 0	0.003 ± 0.006	0 ± 0	0.383 ± 0.144	0 ± 0	0 ± 0	0 ± 0	0 ± 0	0 ± 0	0 ± 0	0 ± 0	0 ± 0	0 ± 0	0.056 ± 0.008	0 ± 0	0.063 ± 0.025	0 ± 0	0 ± 0	0 ± 0	0.488 ± 0.119	0 ± 0	0 ± 0	0.01 ± 0.007	0 ± 0	0.014 ± 0.02	0.007 ± 0.014	0.008 ± 0.01	0.859 ± 0.026	0.011 ± 0.009	0.037 ± 0.007	0.03 ± 0.015	0 ± 0	0.012 ± 0.01	0.028 ± 0.011	0.384 ± 0.1	0.01 ± 0.009
	Manure	80% of the field capacity	0.005 ± 0.007	0 ± 0	0.13 ± 0.035	1.68 ± 0.806	1.371 ± 0.361	1.207 ± 0.307	0.023 ± 0.006	0.027 ± 0.02	0 ± 0	0.208 ± 0.019	0.244 ± 0.136	0 ± 0	0.037 ± 0.012	0 ± 0	4.173 ± 0.942	0 ± 0	0 ± 0	0 ± 0	0 ± 0	0 ± 0	0.018 ± 0.021	0 ± 0	0 ± 0	0 ± 0	0.471 ± 0.367	0 ± 0	0.395 ± 0.137	0 ± 0	0.007 ± 0.014	0 ± 0	1.328 ± 0.211	0 ± 0	0 ± 0	0.01 ± 0.01	0.007 ± 0.008	0 ± 0	0.016 ± 0.019	0.004 ± 0.008	0.995 ± 0.25	0.026 ± 0.005	0.644 ± 0.109	0.043 ± 0.022	0 ± 0	0.016 ± 0.012	0.048 ± 0.01	0.6 ± 0.212	0.018 ± 0.008
		20% of the field capacity	0.005 ± 0.006	0 ± 0	0.129 ± 0.04	2.385 ± 0.535	1.202 ± 0.185	1.995 ± 0.698	0.009 ± 0.006	0.053 ± 0.015	0.002 ± 0.003	0.266 ± 0.14	0.331 ± 0.129	0 ± 0	0.018 ± 0.006	0 ± 0	4.473 ± 1.236	0 ± 0	0 ± 0	0 ± 0	0 ± 0	0 ± 0	0.006 ± 0.007	0.005 ± 0.011	0.002 ± 0.005	0 ± 0	0.547 ± 0.178	0.009 ± 0.012	0.385 ± 0.041	0.001 ± 0.002	0 ± 0	0.005 ± 0.005	1.062 ± 0.088	0 ± 0	0 ± 0	0.007 ± 0.005	0 ± 0	0.008 ± 0.006	0.022 ± 0.017	0 ± 0	0.997 ± 0.067	0.033 ± 0.007	0.561 ± 0.087	0.032 ± 0.002	0 ± 0	0.009 ± 0.006	0.033 ± 0.007	0.634 ± 0.172	0.017 ± 0.003
Treatment or interaction			aac(3)-ib	aac(6')I2	aacC2	aadA6	aadE	ant6-ia	ant6-ib	aph3-III	strA	catA1	catB3	ceoA	cmlA1	cmx(A)	floR	bla1	blaB-11_13_14	blaCMY	blaCTX-M	blaGES	bla.L1	blaOXY-1	blaOXY-2	blaZ	KPC	mecA	Pbp5	penA	copA	norA	qnrA	QnrB4	QnrS1_S3_S5	acrA	acrF	adeA	emrD	mdtE/yhiU	mdtg	mdth	mepA	mexB	tolC	erm(36)	erm(B)	ermT	lnuA
Fertilization type			*		***	***	***	***		***		***	***	*	***		***						***				***	***	***			***	***				**					***	***			*	**	***	***
Plant presence			*			**	***							*	**		**			**									*									**	**		**		***					*
Fertilization type : Plant presence			***			**	**							*			*																***								**		***
Moisture level							***		***						***														**								*						***	**
Fertilization type : Moisture level			***				***			**																					*		***							*	*		**
Plant presence : Moisture level			***			**	***		***											*								*				**	*								**						***
Fertilization type : Plant presence : Moisture level						**	***			**																		*	**			*	***						*					*
B) Plant samples
Plant presence	Fertilization	Moisture	aac(3)-ib	aac(6')I1	aacC2	aadA6	aadE	ant6-ia	ant6-ib	aph3-III	strA	catA1	catB3	ceoA	cmlA1	cmx(A)	floR	bla1	blaB-11_13_14	blaCMY	blaCTX-M	blaGES	bla-L1	blaOXY-1	blaOXY-2	blaZ	KPC	mecA	Pbp5	penA	copA	norA	qnrA	QnrB4	QnrS1_S3_S5	acrA	acrF	adeA	emrD	mdtE/yhiU	mdtg	mdth	mepA	mexB	tolC	erm(36)	erm(B)	ermT	lnuA
Planted with radish	Mineral	80% of the field capacity	0 ± 0	0 ± 0	0 ± 0	0 ± 0	0 ± 0	0 ± 0	0 ± 0	0 ± 0	0 ± 0	0 ± 0	0 ± 0	0 ± 0	0.022 ± 0.044	0 ± 0	0.067 ± 0.134	0 ± 0	0.045 ± 0.091	0 ± 0	0 ± 0	0 ± 0	0 ± 0	0 ± 0	0.021 ± 0.043	0 ± 0	0.067 ± 0.134	0 ± 0	0.435 ± 0.168	0.105 ± 0.081	0 ± 0	0 ± 0	0 ± 0	0 ± 0	0 ± 0	0 ± 0	0.197 ± 0.042	0 ± 0	0 ± 0	0 ± 0	0.035 ± 0.042	0 ± 0	0 ± 0	0 ± 0	0 ± 0	0 ± 0	0 ± 0	0.072 ± 0.145	0 ± 0
		20% of the field capacity	0 ± 0	0 ± 0	0 ± 0	0 ± 0	0 ± 0	0.085 ± 0.108	0 ± 0	0.012 ± 0.024	0.017 ± 0.034	0.022 ± 0.044	0 ± 0	0.049 ± 0.057	0 ± 0	0 ± 0	0.081 ± 0.106	0 ± 0	0 ± 0	0.113 ± 0.091	0 ± 0	0 ± 0	0 ± 0	0 ± 0	0.013 ± 0.025	0 ± 0	0 ± 0	0 ± 0	0.329 ± 0.249	0.031 ± 0.037	0 ± 0	0.082 ± 0.14	0.025 ± 0.05	0 ± 0	0 ± 0	0.01 ± 0.021	0.136 ± 0.097	0 ± 0	0 ± 0	0.01 ± 0.02	0.062 ± 0.026	0 ± 0	0 ± 0	0 ± 0	0 ± 0	0 ± 0	0.114 ± 0.137	0 ± 0	0 ± 0
	Manure	80% of the field capacity	0 ± 0	0 ± 0	0 ± 0	0 ± 0	1.56 ± 2.852	0.157 ± 0.314	0 ± 0	0.02 ± 0.04	0 ± 0	0 ± 0	0 ± 0	0.039 ± 0.077	0 ± 0	0 ± 0	0.201 ± 0.246	0 ± 0	0 ± 0	0.039 ± 0.078	0 ± 0	0 ± 0	0 ± 0	0 ± 0	0.062 ± 0.097	0 ± 0	0.247 ± 0.181	0 ± 0	0.291 ± 0.246	0 ± 0	0 ± 0	0 ± 0	0 ± 0	0 ± 0	0 ± 0	0 ± 0	0.097 ± 0.067	0 ± 0	0.071 ± 0.143	0.305 ± 0.449	0.113 ± 0.035	0 ± 0	0.026 ± 0.051	0 ± 0	0 ± 0	0 ± 0	0 ± 0	0 ± 0	0 ± 0
		20% of the field capacity	0 ± 0	0 ± 0	0 ± 0	0 ± 0	0.033 ± 0.066	0.05 ± 0.099	0 ± 0	0 ± 0	0 ± 0	0 ± 0	0 ± 0	0.149 ± 0.215	0 ± 0	0 ± 0	0.36 ± 0.265	0 ± 0	0 ± 0	0.201 ± 0.244	0 ± 0	0 ± 0	0 ± 0	0 ± 0	0.146 ± 0.128	0 ± 0	0 ± 0	0 ± 0	0.341 ± 0.375	0 ± 0	0 ± 0	0 ± 0	0 ± 0	0 ± 0	0 ± 0	0 ± 0	0.07 ± 0.085	0 ± 0	0 ± 0	0 ± 0	0 ± 0	0 ± 0	0 ± 0	0 ± 0	0 ± 0	0 ± 0	0 ± 0	0 ± 0	0 ± 0
Treatment or interaction			aac(3)-ib	aac(6')I1	aacC2	aadA6	aadE	ant6-ia	ant6-ib	aph3-III	strA	catA1	catB3	ceoA	cmlA1	cmx(A)	floR	bla1	blaB-11_13_14	blaCMY	blaCTX-M	blaGES	bla-L1	blaOXY-1	blaOXY-2	blaZ	KPC	mecA	Pbp5	penA	copA	norA	qnrA	QnrB4	QnrS1_S3_S5	acrA	acrF	adeA	emrD	mdtE/yhiU	mdtg	mdth	mepA	mexB	tolC	erm(36)	erm(B)	ermT	lnuA
Fertilization type							**										*								*		*			***							*										**
Moisture level																				*							**														**						**
Fertilization type : Moisture level																																								**	***						**
[truncated: 40 more columns]

## Sheet: Supplementary table 4
Supplementary Table 4. P values and F-statistic of the PERMANOVA analysis of (A) soil prokaryotic community composition; and (B) community-level physiological profiles of soil cultivable heterotrophic bacteria.
A) Soil prokaryotic community composition
	p value	F-statistic
Fertilization type	0.068	1.52
Moisture level	0.44	0.96
Plant presence	0.987	0.61
Fertilization type : Moisture level	0.388	1
Fertilization type : Plant presence	0.592	0.86
Plant presence : Moisture level	0.427	0.97
Fertilization type : Plant presence : Moisture level	0.863	0.72
B) Community-level physiological profiles of soil cultivable heterotrophic bacteria
	p value	F-statistic
Fertilization type	0.0111	2.66
Moisture level	0.0015	3.62
Plant presence	0.0001	10.04
Fertilization type : Moisture level	0.2387	1.23
Fertilization type : Plant presence	0.1449	1.46
Plant presence : Moisture level	0.0287	2.23
Fertilization type : Plant presence : Moisture level	0.1071	1.59

## Sheet: Supplementary table 5
Supplementary Table 5. Spearman correlations between ARGs and MGE-linked genes in treated soils. Only significant correlations (p < 0.05) with a high correlation factor (R > 0.7) were selected. The number of correlations (ARGs found to correlate with MGE-linked genes and viceversa) is indicated.
	Plant presence		Fertilization		Moisture
	Planted with radish	Unplanted	Manure	Mineral	20% of the field capacity	80% of the field capacity
No. of correlations	33	15	18	23	28	13
No. of ARGs	21	10	17	20	20	7
No. of MGE-linked genes	5	4	4	5	4	3

## Sheet: Supplementary table 6
Supplementary Table 6. Soil basal respiration (mg C-CO2 kg-1 dry soil); Substrate-induced respiration (mg C-CO2 kg-1 dry soil); 16s rRNA: copies of the 16s rRNA gene (copies g-1 dry soil). Mean (n = 4) ± standard deviation. Statistically significant differences were determined with permutation ANOVA test and are represented as *(p < 0.1), **(p < 0.05), and ***(p < 0.01).
			Basal respiration	Substrate-induced respiration	16s rRNA
Planted	Mineral	80% of the field capacity	0.882 ± 0.186	2.809 ± 0.186	31358082.415 ± 5619240.991
		20% of the field capacity	0.678 ± 0.078	3.625 ± 0.542	20677009.625 ± 2878048.737
	Manure	80% of the field capacity	0.892 ± 0.054	2.664 ± 0.257	49945396.597 ± 14085696.331
		20% of the field capacity	1.078 ± 0.086	3.559 ± 0.309	66099026.424 ± 43111596.801
Unplanted	Mineral	80% of the field capacity	0.537 ± 0.068	3.271 ± 0.696	14017593.905 ± 1341778.315
		20% of the field capacity	0.638 ± 0.043	4.635 ± 0.149	25500854.821 ± 3546592.663
	Manure	80% of the field capacity	0.718 ± 0.111	3.295 ± 0.431	47752526.763 ± 8730203.549
		20% of the field capacity	0.818 ± 0.207	5.896 ± 1.308	37405667.742 ± 10503823.214
Treatment or interaction			Basal respiration	Substrate-induced respiration	16s rRNA
Fertilization type			***		***
Moisture level				***	*
Plant presence			***	**
Fertilization type : Moisture level			**
Fertilization type : Plant presence
Plant presence : Moisture level				***
Fertilization type : Plant presence : Moisture level			**		**

## Sheet: Supplementary table 7
Supplementary Table 7. Plant biometric parameters, chlorophyll fluorescence kinetics, and pigment profiles; Plant fresh weight (g), ϕ Po = Photosynthetic efficiency ϕ Po, Ψ o = Photosynthetic efficiency Ψ o, ϕ Eo = Photosynthetic efficiency ϕ Eo, ϕ Do = Photosynthetic efficiency ϕ Do, ϕ Pav = Photosynthetic efficiency ϕ Pav, PI Abs =Performance Index PI ABS, ABS/RC = Photon flux absorbed by the a…
		Fresh weight of aerial parts	Plant fresh weight	ϕ Po	Ψ o	ϕ Eo	ϕ Do	ϕ Pav	PI Abs	ABS/RC	Tro/RC	Eto/RC	Dio/RC	Qy	FvFm	Carotenoids	Chlorophylls a+b	Total VAZ	Total tocopherols
Mineral	80% of the field capacity	15.29 ± 1.98	68.6 ± 9.36	0.75 ± 0.01	0.45 ± 0.06	0.34 ± 0.05	0.25 ± 0.01	962.73 ± 7.34	0.92 ± 0.41	2.97 ± 0.14	2.23 ± 0.08	0.99 ± 0.11	0.74 ± 0.07	0.76 ± 0.01	0.75 ± 0.01	93.59 ± 17.39	327.56 ± 54.76	18.1 ± 3.26	4.1 ± 0.33
	20% of the field capacity	8.7 ± 1.09	14.22 ± 4.98	0.79 ± 0.01	0.66 ± 0.02	0.52 ± 0.02	0.21 ± 0.01	957.87 ± 6.32	3.31 ± 0.65	2.39 ± 0.15	1.87 ± 0.09	1.23 ± 0.07	0.52 ± 0.07	0.78 ± 0.01	0.79 ± 0.01	100.33 ± 18.07	342.93 ± 65.75	18.26 ± 3.28	5.74 ± 1.26
Manure	80% of the field capacity	5.25 ± 1.76	24.85 ± 10.45	0.75 ± 0.02	0.46 ± 0.03	0.35 ± 0.02	0.25 ± 0.02	955.02 ± 2.41	0.95 ± 0.16	2.95 ± 0.43	2.2 ± 0.29	1.02 ± 0.18	0.76 ± 0.15	0.74 ± 0.02	0.75 ± 0.02	70.12 ± 14.72	230.61 ± 42.45	10.85 ± 2.54	8.24 ± 1.26
	20% of the field capacity	5.63 ± 0.46	13.12 ± 4.22	0.77 ± 0.02	0.59 ± 0.04	0.45 ± 0.05	0.23 ± 0.02	952.23 ± 7.57	2.24 ± 0.79	2.49 ± 0.31	1.91 ± 0.18	1.11 ± 0.06	0.58 ± 0.14	0.77 ± 0.02	0.77 ± 0.02	97.19 ± 17.46	315.59 ± 59.58	15.19 ± 3.52	8.28 ± 3.31
Treatment or interaction
Fertilization type			***					*	*					**			*	**	***
Moisture level			***	**	***	***	***		***	***	***	**	***	***	***	*
Fertilization type : Moisture level			***		**	*			*
